# Supplementary material for: Everyday Cardiac Surgery in Jehovah‘s Witnesses of Typically Advanced Age: Clinical Outcome and Matched Comparison
Source: Preprints.org preprint supplement (doi:10.20944/preprints202307.0382.v1), 2023-07-07
Supplement: Supplementary file 3 [file supplementary]

## Sheet: Raw_Data
Group	Age	Gender	Size	Weight	BMI	BSA	Emergency	EuroSCORE	log. EuroSCORE	EuroSCORE2	Valve	CABG	Ascending	Arch	Other	Temperature	Redo	Mortality	Duration_Surgery	ECC_Time	Clamp_Time	LoS_Total	LoS_ICU	LoS_postop	RBC	Platelets	Hemoglobin_pre	Hematocrit_pre	Creatinine_pre	Clearance_pre	Hemoglobin_post	Hematocrit_post	Creatinine_post	Clearance_post	Endocarditis	Malignancy	Hypertension	Hyperlipidemia	Smoking	NIDDM	IDDM	Stroke_pre	PVD	CVD	Infarction_pre	COPD	PHT	LVEF_pre	AFib_pre
JW	53	male	164	75	27.8852	1.81564	no emergency	2	1.68	0.9169	0	1	0	0	0	36	0	0	190	101	58	17280	1030	15430	0	0	10.5	0.49	89	90.014	6.8	0.33	77	104.042	0	0	1	1	0	0	0	0	0	0	0	0	0	55	0
JW	60	female	140	47	23.9796	1.32724	no emergency	7	7.09	3.0733	1	1	1	0	0	34	0	0	301	206	122	24491	1365	21357	0	0	7.7	0.37	43	91.2553	6.7	0.32	49	80.0812	0	0	1	1	0	0	0	0	0	0	0	0	0	60	0
JW	69	male	174	75	24.7721	1.89525	no emergency	3	1.82	1.2258	0	1	0	0	0	32	0	0	242	154	85	16035	1030	11526	0	0	9.1	0.42	76	86.0252	6.1	0.29	68	96.1458	0	0	0	1	0	0	1	0	0	0	0	0	0	!	0
JW	68	male	173	74	24.7252	1.87661	no emergency	2	1.64	0.62564	0	1	0	0	0	36	0	0	227	102	57	13231	871	11262	0	0	8.3	0.39	70	93.4514	7	0.33	87	75.1908	0	0	1	1	0	0	0	0	0	0	0	0	0	55	0
JW	65	female	154	54	22.7694	1.50864	no emergency	8	9.14	5.54309	1	0	0	0	0	32	0	0	232	168	124	71879	1455	33175	0	0	6.9	0.34	88	48.0298	5.5	0.28	71	59.5299	1	0	0	0	0	0	0	0	0	0	0	0	0	69	1
JW	72	male	176	79	25.5036	1.95368	no emergency	5	3.77	2.15766	0	1	0	0	0	36	0	0	152	73	36	17225	2657	15883	0	0	8.2	0.39	74	89.13	5.3	0.25	72	91.6059	0	0	1	1	0	0	0	0	0	0	0	0	0	!	0
JW	69	female	172	66	22.3094	1.78004	no emergency	5	4.09	3.20359	1	1	0	0	0	36	0	0	210	151	102	34701	2785	15917	0	0	7.7	0.36	73	66.9913	6.2	0.3	93	52.5845	0	0	1	1	1	0	0	0	0	0	0	0	0	65	1
JW	51	female	168	63	22.3214	1.71568	no emergency	6	5	4.44981	0	0	0	0	1	36	0	0	68	13	0	28908	1964	27439	0	0	6.6	0.31	82	71.3601	4.3	0.2	77	75.9939	0	1	0	0	0	0	0	0	0	0	0	0	0	60	0
JW	79	female	164	62	23.0518	1.67454	no emergency	11	28.38	28.032	1	0	1	1	0	20	0	0	383	279	135	38465	1209	32758	0	0	6.9	0.33	105	37.5899	7.6	0.38	51	77.3909	0	0	1	0	0	0	0	0	0	0	0	0	0	60	0
JW	81	female	169	66	23.1084	1.75748	no emergency	20	85.36	89.7995	1	0	0	0	0	34	1	1	362	239	102	7289	1393	1393	0	0	8.3	0.38	110	36.9438	6.4	0.3	162	25.0853	1	0	0	0	0	0	0	0	0	0	0	0	1	55	0
JW	58	male	172	88	29.7458	2.01154	emergency	4	3.1	1.67304	0	1	0	0	0	36	0	0	169	88	62	17118	794	16627	0	0	9.3	0.46	77	115.06	7.1	0.35	73	121.365	0	0	1	1	0	0	0	0	0	0	0	0	0	60	0
JW	72	male	168	90	31.8878	1.9965	no emergency	8	9.94	2.86	1	0	0	0	0	36	0	0	151	91	57	14357	1465	11421	0	0	8.6	0.42	70	107.343	7.1	0.34	67	112.149	0	0	1	0	0	1	0	0	0	0	0	0	0	30	1
JW	83	female	166	55	19.9594	1.60546	no emergency	9	13.99	8.34949	1	0	0	0	1	32	0	0	162	105	66	40429	1369	23005	0	0	8	0.38	96	34.0804	6.2	0.31	81	40.3916	0	0	0	0	0	0	0	0	0	0	0	0	0	70	0
JW	78	female	162	54	20.5761	1.56506	no emergency	8	10.81	11.4618	1	0	0	0	0	34	0	0	223	157	103	30232	1390	25831	0	0	8.4	0.39	77	45.3768	5.1	0.24	260	13.4385	0	0	0	0	0	0	0	0	0	0	0	0	0	50	1
JW	67	male	180	90	27.7778	2.0989	emergency	9	14.96	7.06524	1	0	1	1	0	26	0	0	252	152	79	39900	21293	38213	0	0	7.7	0.38	74	109.007	6.6	0.32	72	112.035	0	0	1	0	0	0	0	0	0	0	0	0	0	45	0
JW	66	male	172	77	26	1.92	no emergency	4	2.5	2.84309	1	1	0	0	0	34	0	0	278	212	149	59183	30223	56051	0	0	7.6	0.35	105	66.6274	6.1	0.31	80	87.4485	0	0	0	0	0	0	0	0	0	0	0	0	0	64	0
JW	68	male	170	60	20.7612	1.69495	no emergency	8	11.95	13.4513	1	0	1	0	0	34	0	0	293	205	139	33283	28685	28685	0	0	8.3	0.38	69	76.8696	5.3	0.24	40	132.6	0	0	1	0	0	0	0	0	0	0	0	0	1	69	1
JW	41	male	180	78	24.0741	1.97505	no emergency	5	4.4	1.59155	1	0	0	0	0	36	0	0	206	149	93	52940	1401	43232	0	0	5.9	0.29	38	249.497	5.7	0.28	59	160.693	1	0	0	0	0	0	0	0	0	0	0	0	0	55	0
JW	61	male	178	92	29.0367	2.10151	emergency	9	13.25	2.86582	1	0	0	0	0	34	1	0	294	173	96	21090	2632	15587	0	0	6.8	0.31	99	90.1363	5.5	0.26	117	76.2691	1	0	0	0	0	0	0	0	0	0	0	0	0	!	1
JW	72	male	160	77	30.0781	1.80348	no emergency	3	2.16	0.93966	0	1	0	0	0	36	0	0	111	41	14	10176	1465	8690	0	0	8.1	0.39	73	88.0636	5.7	0.28	74	86.8736	0	0	1	1	0	0	0	0	0	0	0	0	0	60	0
JW	72	female	158	58	23.2335	1.58434	no emergency	5	4.3	2.43394	0	1	0	0	0	34	0	0	272	179	131	31609	1235	14193	0	0	8.8	0.42	72	57.1667	5.3	0.25	74	55.6217	0	0	1	1	0	0	0	0	0	0	0	0	0	57	0
JW	65	female	170	89	30.7958	2.00416	no emergency	3	1.87	0.958477	0	1	0	0	0	36	0	0	166	90	48	26106	1099	21385	0	0	7.9	0.38	65	107.171	6.8	0.32	66	105.547	0	0	1	1	0	0	0	0	0	0	0	0	0	!	0
JW	69	male	166	82	29.8	1.94	no emergency	7	9.81	2.37213	0	1	0	0	0	36	0	0	341	142	99	40280	3840	38360	0	0	9	0.44	82	87.1722	6.4	0.31	79	90.4826	0	0	0	1	0	1	0	1	0	0	1	0	0	50	0
JW	74	male	184	75	22.1526	1.97361	no emergency	8	11.97	4.88908	1	0	1	0	1	34	0	0	174	102	57	20230	1401	15758	0	0	8.9	0.42	74	82.1284	7.8	0.37	80	75.9688	0	0	1	1	0	0	0	0	0	0	0	0	0	60	1
JW	74	female	173	80	26.7299	1.93983	no emergency	9	15.34	14.1789	1	1	0	0	0	34	0	1	272	195	133	38706	31312	31312	0	0	8.1	0.39	93	59.2502	2.9	0.19	150	36.7351	0	0	0	0	0	0	0	0	0	1	1	0	0	40	1
JW	75	female	162	85	32.3884	1.89788	no emergency	7	5.93	5.11852	1	1	0	0	0	32	0	0	320	173	105	46080	2235	42555	0	0	7.3	0.34	118	48.864	5.8	0.28	114	50.5785	0	0	1	1	0	1	0	0	0	0	0	0	0	75	0
JW	56	female	163	111	41.778	2.13533	no emergency	3	2.08	1.14657	1	0	0	0	0	36	0	0	196	67	78	20205	1368	18652	0	0	8.5	0.42	71	137.051	6.1	0.3	60	162.177	0	0	1	0	0	0	0	0	0	0	0	0	0	60	0
JW	62	male	179	89	27.7769	2.08054	no emergency	4	2.79	1.31471	1	0	0	0	0	34	0	0	129	83	59	23121	1391	12994	0	0	9.9	0.48	106	80.4079	7.7	0.36	96	88.7837	0	0	0	0	0	0	0	0	0	0	0	0	0	50	0
JW	78	female	156	87	35.7495	1.86499	no emergency	9	12.87	6.89457	0	1	0	0	0	36	0	0	238	115	64	37331	19960	32899	4	0	7.8	0.38	108	52.1226	5.3	0.26	93	60.5294	0	0	1	0	0	0	1	0	1	0	1	0	0	!	0
JW	75	male	169	78	27.31	1.88679	no emergency	8	11.47	4.95325	0	1	0	0	0	36	0	0	255	134	90	20356	1241	14403	0	0	9.3	0.44	123	50.6084	6.3	0.31	95	65.5246	0	0	1	1	0	1	0	0	0	0	0	1	0	30	0
JW	80	female	163	85	31.9922	1.90636	no emergency	7	8.07	2.37076	0	1	0	0	0	36	0	0	188	0	0	28805	8559	34444	0	0	6.9	0.33	83	64.1255	5.5	0.27	111	47.9497	0	0	0	1	0	0	0	0	0	0	0	1	0	!	0
JW	65	male	178	91	28.7211	2.09177	no emergency	5	4.28	4.07923	0	1	0	0	0	36	0	0	181	80	40	36167	2408	27134	0	0	7.6	0.36	138	60.7216	5.4	0.26	132	63.4817	0	0	1	1	0	0	1	0	1	0	0	1	0	55	0
NW	68	male	177	78	24.8971	1.95113	no emergency	7	7.62	3.07514	0	1	0	0	0	36	0	0	163	77	61	46324	1517	41911	2	0	7.7	0.38	65	106.08	6.6	0.33	44	156.709	0	0	0	0	1	1	0	0	1	0	1	0	0	50	0
NW	67	male	172	72	24.3375	1.8471	no emergency	3	2.4	1.50393	0	1	0	0	0	36	0	0	252	113	74	23004	1095	13893	0	0	9.2	0.43	101	63.8931	6.8	0.33	100	64.532	0	0	1	0	0	0	0	0	0	0	0	0	0	50	0
NW	71	male	188	98	27.7275	2.24596	no emergency	6	4.98	1.04155	1	0	0	0	0	36	0	0	165	90	53	33127	1692	28628	0	0	8.9	0.42	90	92.247	6.1	0.29	87	95.428	0	0	1	1	0	0	0	0	0	0	0	0	0	45	0
NW	60	female	162	86	32.7694	1.90733	no emergency	4	2.28712	1.41966	0	1	0	0	0	36	0	0	352	135	69	30291	5253	28382	7	2	7.1	0.33	77	93.2473	6.6	0.31	81	88.6425	0	0	1	1	0	1	0	0	0	0	0	0	0	63	0
NW	83	male	185	82	23.9591	2.05796	no emergency	5	4.3	2.35857	0	1	0	0	0	32	0	0	273	119	70	37529	1043	35595	4	0	8.4	0.39	85	67.5133	7	0.32	74	77.5491	0	0	1	1	0	1	0	0	0	0	0	0	0	75	1
NW	60	male	168	85	30.1162	1.94858	emergency	7	5.71	1.61502	0	1	0	0	0	36	0	0	193	94	48	17494	3921	16757	0	2	9.9	0.46	62	134.659	7.4	0.34	52	160.556	0	0	1	1	1	0	0	0	0	0	1	0	0	60	0
NW	67	male	172	76	25.6896	1.89004	no emergency	6	4.67	2.17952	0	1	0	0	0	36	0	0	260	112	80	15869	1084	11354	0	0	7.7	0.38	97	70.2238	6.4	0.31	94	72.465	0	0	1	0	0	1	0	0	0	0	0	0	0	!	0
NW	71	female	175	67	21.8776	1.81406	no emergency	6	4.76	3.61264	1	0	0	0	0	32	0	0	176	95	68	43348	1397	21620	0	0	8.4	0.39	104	46.3905	7.4	0.36	88	54.8252	0	0	0	0	0	0	0	0	0	0	0	0	0	57	1
NW	61	female	163	65	24.4646	1.70095	no emergency	4	2.43756	1.17935	1	0	0	0	0	30	0	0	136	93	55	37577	4068	22848	4	0	7.5	0.35	62	86.4346	7.8	0.37	46	116.499	0	0	1	0	0	0	0	0	0	0	0	0	0	83	0
NW	74	male	174	85	28.075	2.0269	no emergency	4	3.59	1.83445	0	1	0	0	0	36	0	0	190	111	59	27368	625	20365	0	0	8.8	0.41	98	70.284	6.8	0.33	110	62.6167	0	0	1	0	0	0	0	0	0	0	0	0	0	80	0
NW	57	male	176	78	25.1808	1.94314	no emergency	2	1.51	1.06676	0	1	0	0	0	36	0	0	160	83	50	29664	436	20353	2	0	7.9	0.39	93	85.4692	7.7	0.36	83	95.7667	0	0	1	1	1	0	0	0	0	0	1	0	0	64	0
NW	70	male	165	80	29.3848	1.87437	no emergency	5	3.2	1.39455	0	1	0	0	0	36	0	0	138	67	39	17364	359	12819	2	0	6.9	0.34	84	81.8519	6	0.28	78	88.1481	0	0	1	1	0	0	0	0	0	0	1	0	0	72	0
NW	67	male	143	60	29.3413	1.4952	no emergency	4	2.67	1.89865	1	1	0	0	0	32	0	0	301	198	141	33379	28793	28793	6	0	8.8	0.4	100	53.7767	5.9	0.28	115	46.7623	0	0	1	0	0	1	0	0	0	0	0	0	0	67	0
NW	70	male	178	83	26.1962	2.01154	no emergency	5	3.6	2.77075	0	1	0	0	0	36	0	0	202	78	40	21596	1015	12625	0	0	9	0.43	95	75.0883	7.1	0.33	106	67.2961	0	0	1	0	0	0	0	0	1	0	0	0	0	65	0
NW	47	female	190	83	22.9917	2.10897	no emergency	15	57.18	63.7389	1	1	1	0	0	28	1	1	500	192	125	4772	1475	1475	!	!	8.4	0.4	95	84.7961	6.3	0.3	225	35.8028	0	0	0	0	0	0	0	0	0	0	0	0	0	45	0
NW	38	male	192	98	26.5842	2.2805	no emergency	2	1.51	0.920368	1	0	0	0	0	32	0	0	192	133	94	20390	1089	18593	0	0	9.6	0.46	75	163.638	6.3	0.3	68	180.483	0	0	1	0	0	0	0	0	0	0	0	0	0	45	0
NW	74	female	149	70	31.5301	1.64472	no emergency	8	9.69	3.27753	0	1	0	0	0	36	0	0	294	112	74	24494	944	19743	2	0	7.9	0.37	35	137.757	6.4	0.3	42	114.797	0	0	1	1	1	0	0	0	0	0	1	0	0	60	0
NW	80	female	156	72	29.5858	1.72087	no emergency	11	20.14	5.83149	1	0	0	0	0	34	1	0	187	134	95	25905	1377	24385	2	0	8.6	0.4	76	59.3211	6.1	0.28	86	52.4233	0	0	1	1	0	0	0	0	0	0	0	0	0	60	1
NW	75	female	153	47	20.0777	1.4155	no emergency	7	6.07	1.72422	1	0	0	0	0	36	0	0	132	92	63	39178	1425	18928	2	0	7.7	0.36	50	63.7646	7.1	0.33	49	65.066	0	0	0	0	0	0	0	0	0	0	0	0	0	55	0
NW	63	male	175	100	32.6531	2.15065	no emergency	6	5.76	2.67743	0	1	0	0	0	36	0	0	207	103	56	18498	1377	11425	0	0	9.6	0.46	88	107.431	6.2	0.29	82	115.291	0	0	0	0	1	1	0	0	1	0	1	0	0	50	0
NW	59	male	162	85	32.3884	1.89788	no emergency	0	0.93	0.9169	0	1	0	0	0	36	0	0	285	150	66	20153	967	12516	0	0	9.8	0.47	97	87.1469	6.7	0.32	89	94.9803	0	0	1	1	0	0	0	0	0	0	0	0	0	!	0
NW	61	male	180	82	25.3086	2.01748	no emergency	8	11.54	2.8641	1	0	0	0	0	36	0	0	135	81	46	31657	14457	24388	2	0	6.8	0.34	68	116.964	6.2	0.32	99	80.3388	1	0	0	0	0	0	0	0	0	0	0	0	0	65	0
NW	68	female	148	74	33.7838	1.67583	no emergency	5	3.92	1.05767	1	0	0	0	0	36	0	0	159	89	62	14372	2837	12782	2	0	8	0.38	82	67.8093	8.7	0.4	85	65.416	0	0	1	0	0	0	0	0	0	0	0	0	0	60	0
NW	63	female	160	82	32.0312	1.85235	no emergency	2	1.67	1.24008	0	1	0	0	0	36	0	0	314	120	80	31712	1010	29835	2	0	9.1	0.44	76	86.7021	7.2	0.35	54	122.025	0	0	1	1	0	0	0	0	0	0	0	0	0	!	0
NW	58	male	185	100	29.2184	2.23906	emergency	7	9.04	1.92053	1	0	0	0	1	36	0	0	276	184	101	15879	5225	15447	8	2	5.9	0.28	68	148.056	6.4	0.3	49	205.465	0	0	0	0	0	0	0	0	0	0	0	0	0	60	0
NW	79	female	155	60	24.974	1.58515	no emergency	8	7.94	2.63018	1	0	0	0	0	36	0	0	148	80	61	37329	1352	18743	1	0	7.9	0.39	57	67.0108	7.1	0.35	33	115.746	0	0	1	0	0	0	0	0	0	0	0	0	0	60	0
NW	58	male	178	80	25.2493	1.98031	no emergency	2	1.51	1.06676	0	1	0	0	0	36	0	0	263	128	72	20241	939	15546	2	0	6.8	0.34	81	99.4348	5.5	0.27	80	100.678	0	0	1	0	0	0	0	0	0	0	1	0	0	!	0
NW	52	male	182	114	34.4161	2.40069	no emergency	2	1.51	0.765064	1	0	0	0	0	34	0	0	152	90	63	17665	1434	13290	0	0	9.8	0.5	58	212.363	8.6	0.43	63	195.509	0	0	1	0	0	0	0	0	0	0	0	0	0	50	0
NW	76	female	160	45	17.5781	1.43539	no emergency	11	20.64	18.1103	1	1	0	0	0	32	0	0	267	170	112	21760	6945	14273	7	2	6.7	0.32	98	30.6694	7.8	0.37	54	55.6593	0	0	0	0	0	0	0	0	0	0	0	0	0	60	1
NW	74	female	160	62	24.2187	1.64483	no emergency	13	42	24.1355	1	0	0	0	0	28	1	0	323	172	75	41711	1150	31481	6	0	5.3	0.27	89	47.9827	7.5	0.36	93	45.9189	1	0	1	0	0	1	0	0	0	0	0	0	0	50	0
NW	67	male	178	103	32.5085	2.20484	no emergency	3	2.32	0.831514	0	1	0	0	0	36	0	0	246	91	65	18927	3335	15852	0	0	8.6	0.41	96	96.1631	6	0.29	91	101.447	0	0	1	1	0	1	0	0	0	0	0	0	0	50	0
NW	77	female	175	60	19.5918	1.73094	no emergency	8	10.1023	4.21861	1	1	0	0	0	32	0	0	176	104	58	33259	1615	30325	4	0	7	0.33	72	54.7896	8.4	0.39	56	70.4438	0	0	1	0	0	0	0	0	0	0	0	0	0	54	0
NW	67	male	181	81	24.7245	2.01507	no emergency	2	1.54	1.15863	0	1	0	0	0	32	0	0	244	114	55	20230	969	18224	2	0	8.2	0.38	78	93.075	7.2	0.33	71	102.251	0	0	1	1	0	0	1	0	0	0	0	0	0	76	0
NW	68	male	192	98	26.5842	2.28619	no emergency	4	2.73	1.80194	0	1	0	0	0	36	0	0	325	191	144	17833	1314	13403	2	2	9.4	0.44	104	83.3	6.1	0.29	75	115.509	0	0	1	0	0	0	0	0	0	0	1	0	0	60	0
NW	69	female	163	65	24.4646	1.70095	no emergency	5	4.16	2.29782	0	1	0	0	0	36	0	0	203	117	61	23757	974	16907	2	2	7.3	0.35	71	67.8347	7.1	0.33	84	57.3365	0	0	1	1	0	0	0	0	0	0	1	0	0	55	0
NW	37	male	171	55	18.8092	1.64037	emergency	5	4.64	2.27853	0	1	0	0	0	36	0	0	212	112	63	16037	3959	15588	2	0	9	0.43	71	97.9628	7.8	0.37	62	112.183	0	0	1	1	1	0	0	0	0	0	0	0	0	!	0
NW	74	male	181	81	24.7245	2.01507	no emergency	7	6.91	3.37056	0	1	0	0	1	36	0	0	210	111	69	45892	1058	38399	0	0	9.3	0.44	72	91.1625	9.2	0.44	154	42.6214	0	0	1	1	0	1	0	0	0	0	1	0	0	60	1
NW	71	male	170	93	32.1799	2.04196	no emergency	6	5.03	4.65588	1	1	0	0	0	36	0	0	192	109	71	34511	8189	32712	2	2	8.1	0.4	102	77.2417	6.2	0.31	67	117.592	0	0	1	1	0	1	0	1	0	0	0	0	0	55	1
NW	55	male	178	73	23.04	1.90473	no emergency	5	4.65	1.6445	1	0	1	0	0	34	0	0	186	128	81	15870	1440	12818	0	2	9.2	0.43	71	107.301	8.2	0.38	83	91.7875	0	0	0	0	0	0	0	0	0	0	0	0	0	60	0
NW	73	female	170	70	24.2215	1.80971	no emergency	6	5.28	2.78114	1	1	0	0	1	32	0	0	230	147	91	21798	1344	18725	4	0	8.8	0.42	71	68.9371	5.8	0.27	76	64.4018	0	0	0	1	0	0	0	0	0	0	0	0	0	60	0
NW	61	female	164	84	31.2314	1.90523	no emergency	4	2.41	0.861319	1	0	0	0	0	36	0	0	238	119	82	21969	1017	20094	2	0	8.6	0.41	48	144.279	7.4	0.36	46	150.552	0	0	1	0	1	0	0	0	0	0	0	0	0	60	0
NW	77	female	163	80	30.1103	1.85787	no emergency	7	6.92	1.82358	1	0	0	0	0	36	0	0	128	82	56	17300	367	15721	0	0	7.8	0.38	67	78.5045	6.4	0.3	92	57.1717	0	0	0	0	0	1	0	0	0	0	0	0	0	74	0
NW	71	male	171	105	35.9085	2.15921	no emergency	9	14.28	5.47287	0	1	1	1	0	20	0	1	615	461	205	52479	50535	50535	!	0	9.8	0.45	91	97.75	5.1	0.24	589	15.1023	0	0	1	0	0	0	0	0	0	0	0	0	0	50	1
NW	79	female	154	53	22.3478	1.4967	no emergency	8	7.94	1.83	1	1	0	0	0	36	0	0	196	122	91	36246	5583	34375	8	0	8.5	0.39	62	54.4193	6.1	0.28	74	45.5945	0	0	1	1	0	1	0	0	0	0	0	0	0	60	0
NW	66	male	180	74	22.8395	1.93136	no emergency	4	2.59	1.33486	0	1	0	0	0	36	0	0	159	80	38	32764	1062	19760	0	0	7.7	0.38	99	67.9122	6.2	0.3	132	50.9342	0	1	1	1	0	0	0	0	0	0	0	0	0	60	0
NW	62	female	153	70	29.903	1.67662	no emergency	4	2.58	2.04762	1	0	0	0	1	36	0	0	167	106	69	17280	3024	14250	0	0	8.4	0.4	71	80.2552	7.1	0.34	80	71.2265	0	0	1	1	0	0	0	0	0	0	0	0	0	55	0
NW	75	female	152	60	25.9695	1.56285	no emergency	11	17.43	10.891	1	0	0	0	0	32	0	0	240	164	122	30180	1450	24280	4	0	6	0.29	70	58.144	7.1	0.34	61	66.7227	0	0	1	1	0	1	0	0	1	0	1	0	0	!	0
NW	75	female	152	54	23.3726	1.49441	no emergency	7	6.15	2.715	0	1	0	0	0	36	0	0	142	50	28	17235	3167	15741	6	0	7.1	0.34	54	67.8347	7.6	0.36	59	62.086	0	0	1	1	0	0	0	0	0	0	1	0	0	59	0
NW	61	female	160	56	21.875	1.57519	no emergency	4	2.43	1.18838	1	0	0	0	0	36	0	0	100	40	22	13244	1432	11772	0	0	8.4	0.41	70	65.9562	6.6	0.31	58	79.6023	0	0	0	0	0	0	0	0	0	0	0	0	0	!	0
NW	79	male	158	60	24.0346	1.60734	no emergency	15	57.07	60.5721	1	0	0	0	1	28	1	1	365	220	77	2194	239	239	6	0	7.9	0.38	135	33.2864	8.7	0.27	!	!	0	0	1	0	0	0	1	0	1	1	1	1	0	30	0
NW	62	male	165	66	24.2424	1.72722	no emergency	3	2.08	1.62454	0	1	0	0	0	34	0	0	263	90	53	18767	2538	13945	6	4	8.1	0.39	83	76.1518	5.9	0.29	80	79.0075	0	0	1	0	0	1	0	0	1	0	0	0	0	65	0
NW	79	male	167	103	36.9	2.19	no emergency	7	8.19	3.32669	0	1	0	0	0	36	0	0	167	67	32	15883	1451	14440	0	0	8.2	0.38	103	74.8944	6.6	0.31	134	57.5681	0	1	1	1	0	1	0	0	0	0	1	0	0	50	0
NW	72	female	154	82	34.5758	1.80173	no emergency	4	3.04	1.58508	1	0	0	0	0	36	0	0	129	79	59	23114	1388	17413	0	0	9	0.43	75	77.589	6.5	0.31	56	103.914	0	0	0	0	0	0	0	0	0	0	0	0	0	60	0
NW	62	male	165	90	33.0579	1.97059	emergency	10	17.91	23.3682	0	1	0	0	0	32	1	0	181	113	25	57864	50229	50229	18	0	9.3	0.39	104	82.875	5.8	0.27	97	88.8557	0	0	1	0	0	0	1	0	0	0	0	1	0	62	0
NW	55	male	169	66	23.1084	1.75748	no emergency	6	6.96	3.074	1	1	0	0	0	36	0	0	192	140	96	35868	1178	21292	2	0	7.5	0.38	71	97.0117	6.7	0.35	60	114.797	0	0	1	0	0	0	0	0	0	0	0	1	0	21	0
NW	81	female	154	70	29.5159	1.68456	no emergency	8	8.89	4.74822	1	0	0	0	0	28	0	0	155	108	57	41770	8325	31366	6	0	7.4	0.35	101	42.6744	7.3	0.35	64	67.3455	0	0	1	1	0	0	0	0	0	0	0	0	0	60	0
NW	71	male	181	80	24.4193	2.00446	no emergency	5	3.37	1.43431	0	1	0	0	0	32	0	0	237	166	62	19095	996	17073	4	0	8.8	0.43	87	77.9004	7.8	0.36	85	79.7333	0	0	1	1	0	0	0	0	0	0	1	0	0	!	0
NW	74	male	172	85	28.7317	1.98211	no emergency	6	7.26	1.51859	0	1	0	0	0	36	0	0	221	118	78	60655	1275	58972	0	0	9.1	0.43	61	112.915	5.9	0.3	71	97.0117	0	1	1	1	1	1	0	0	1	0	0	1	0	55	0
NW	71	male	172	69	23.3234	1.81399	no emergency	3	2.04	1.68259	0	1	0	0	0	36	0	0	239	138	57	22983	1245	21444	2	0	8.6	0.4	108	54.1245	7.6	0.36	104	56.2063	0	0	1	1	0	0	0	0	0	0	0	0	0	!	0
NW	73	female	157	77	31.2386	1.7789	no emergency	8	9.78	6.51434	0	1	0	0	1	36	0	0	210	71	49	21903	6895	19980	2	0	8.2	0.41	94	57.2765	7.1	0.33	94	57.2765	0	0	0	1	0	0	1	0	0	1	0	0	0	60	0
NW	61	male	169	95	33.2621	2.05171	no emergency	4	2.73	2.12075	0	1	0	0	0	36	0	0	213	101	43	14514	2632	12702	0	0	9.7	0.46	73	126.226	8.3	0.4	87	105.913	0	0	1	1	1	0	1	0	0	0	1	0	0	50	0
NW	72	female	152	74	32.0291	1.70854	no emergency	5	4.72	6.17397	0	1	0	0	0	32	0	0	263	139	73	33241	1286	24477	4	0	7.7	0.37	109	48.1785	6.8	0.32	130	40.3958	0	0	1	1	0	0	1	0	0	0	0	1	0	50	0
NW	82	male	172	89	30.0838	2.02123	no emergency	8	10.59	4.69332	1	1	0	0	0	36	0	0	372	222	152	21409	1195	20161	2	2	5.5	0.26	119	53.2587	5.7	0.28	107	59.2317	0	0	1	0	0	0	0	0	0	0	0	1	0	60	0
NW	61	female	169	54	18.9069	1.61381	no emergency	7	6.93	3.68346	1	1	0	0	1	36	0	0	322	242	124	20163	9708	9708	4	0	7.4	0.35	67	66.4484	6.3	0.3	58	76.7594	0	0	1	0	0	0	0	0	0	0	0	0	0	35	0
[truncated: 16 more columns]
